# Supplementary material for: Некоторые особенности развития петербургской (Придворной) церковно-певческой традиции конца XIX начала XX В. Часть 1
Source: Royal Society of Chemistry journal article supplement (doi:10.1039/d3cp00507k), 2012-01-01
Supplement: d3cp00507k1.pdf [file d3cp00507k1.pdf]

## Supporting Information

### Optical properties of in-plane chemically ordered Si-MAX structures

Junais Habeeb Mokkath

[j.mokath@kcst.edu.kw](mailto:j.mokath@kcst.edu.kw)

Quantum Nanophotonics Simulations Lab, Department of Physics, Kuwait College of Science And Technology, Doha Area, 7th Ring Road, P.O. Box 27235, Kuwait.

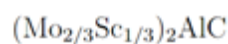

Atomic Charge Difference

| Atom | Charge  |
|------|---------|
| Sc   | -1.3821 |
| Mo   | 4.5684  |
| Mo   | 4.5775  |
| Mo   | 4.5775  |
| Mo   | 4.5684  |
| Mo   | 4.5684  |
| Mo   | 4.5777  |
| Mo   | 4.5775  |
| Mo   | 4.5684  |
| Mo   | 4.5684  |
| Mo   | 4.5775  |
| Mo   | 4.5775  |
| Mo   | 4.5684  |
| Mo   | 4.5684  |
| Mo   | 4.5775  |
| Mo   | 4.5775  |
| Mo   | 4.5684  |
| Mo   | 4.5684  |
| Al   | -0.1754 |
| Al   | -0.1756 |
| Al   | -0.1754 |
| Al   | -0.1755 |
| Al   | -0.0661 |
| Al   | -0.0875 |
| Al   | -0.0875 |
| Al   | -0.0661 |
| Al   | -0.0661 |
| Al   | -0.0875 |
| Al   | -0.0875 |
| Al   | -0.0661 |
| C    | 1.5390  |
| C    | 1.5970  |
| C    | 1.5970  |
| C    | 1.5971  |
| C    | 1.5971  |

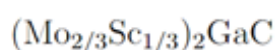

Atomic Charge Difference

| Atom | Charge  |
|------|---------|
| Sc   | -5.4489 |
| Sc   | -5.4489 |
| Sc   | -5.1945 |
| Sc   | -5.1945 |
| Sc   | -5.5680 |
| Sc   | -5.5680 |
| Sc   | -5.4631 |
| Sc   | -5.4631 |
| Mo   | -8.2597 |
| Mo   | -8.2597 |
| Mo   | -7.6266 |
| Mo   | -7.6266 |
| Mo   | -8.2597 |
| Mo   | -8.2597 |
| Mo   | -7.6266 |
| Mo   | -7.6266 |
| Mo   | -7.2978 |
| Mo   | -7.2978 |
| Mo   | -4.0580 |
| Mo   | -4.0580 |
| Mo   | -7.2978 |
| Mo   | -7.2978 |
| Mo   | -4.0580 |
| Mo   | -4.0580 |
| Ga   | -4.0632 |
| Ga   | -4.0632 |
| Ga   | -5.1200 |
| Ga   | -5.1200 |
| Ga   | -4.7202 |
| Ga   | -4.7475 |
| C    | -3.9475 |
| C    | -3.9497 |
| C    | -3.9475 |
| C    | -3.9497 |
| C    | -3.9440 |
| C    | -3.9488 |
| C    | -3.9440 |
| C    | -3.9488 |
| C    | -3.9390 |
| C    | -3.9479 |
| C    | -3.9478 |
| C    | -3.9495 |

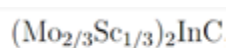

Atomic Charge Difference

| Atom | Charge  |
|------|---------|
| Sc   | -1.4286 |
| Sc   | -1.4286 |
| Sc   | -0.7585 |
| Sc   | -0.7585 |
| Sc   | -1.7294 |
| Sc   | -1.7294 |
| Sc   | -1.6520 |
| Sc   | -1.6520 |
| Mo   | -1.8316 |
| Mo   | -1.8374 |
| Mo   | -1.4633 |
| Mo   | -1.4590 |
| Mo   | -1.8316 |
| Mo   | -1.8374 |
| Mo   | -1.4633 |
| Mo   | -1.4590 |
| Mo   | -1.0437 |
| Mo   | -1.0481 |
| Mo   | 1.0976  |
| Mo   | 1.1036  |
| Mo   | -1.0437 |
| Mo   | -1.0481 |
| Mo   | 1.0976  |
| Mo   | 1.1036  |
| In   | 1.1882  |
| In   | 1.1882  |
| In   | -0.6997 |
| In   | -0.6997 |
| In   | 1.6737  |
| In   | 1.6729  |
| In   | 1.6729  |
| In   | 1.6737  |
| In   | -0.7873 |
| In   | -0.7982 |
| In   | -0.7982 |
| In   | -0.7873 |
| C    | 1.5917  |
| C    | 1.5906  |
| C    | 1.5916  |
| C    | 1.5906  |
| C    | 1.5944  |
| C    | 1.5912  |
| C    | 1.5944  |
| C    | 1.5912  |
| C    | 1.6105  |
| C    | 1.6055  |
| C    | 1.6090  |
| C    | 1.6037  |

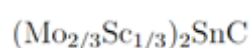

Atomic Charge Difference

| Atom | Charge  |
|------|---------|
| Sc   | -1.6413 |
| Sc   | -1.6408 |
| Sc   | -1.6407 |
| Sc   | -1.6408 |
| Sc   | -1.6408 |
| Mo   | 0.3765  |
| Mo   | 0.3704  |
| Mo   | 0.3704  |
| Mo   | 0.3765  |
| Mo   | 0.3765  |
| Mo   | 0.3704  |
| Mo   | 0.3704  |
| Mo   | 0.3765  |
| Mo   | 0.3765  |
| Mo   | -1.2414 |
| Mo   | -1.2476 |
| Mo   | -1.2476 |
| Mo   | -1.2414 |
| Mo   | -1.2414 |
| Mo   | -1.2475 |
| Mo   | -1.2476 |
| Mo   | -1.2414 |
| Sn   | -0.2748 |
| Sn   | -0.2748 |
| Sn   | -0.9434 |
| Sn   | -0.9434 |
| Sn   | 0.0064  |
| Sn   | -0.0180 |
| Sn   | -0.0180 |
| Sn   | 0.0064  |
| Sn   | -1.0421 |
| Sn   | -1.0621 |
| Sn   | -1.0621 |
| Sn   | -1.0421 |
| C    | 1.5901  |
| C    | 1.5821  |
| C    | 1.5846  |
| C    | 1.5846  |
| C    | 1.5813  |
| C    | 1.5813  |

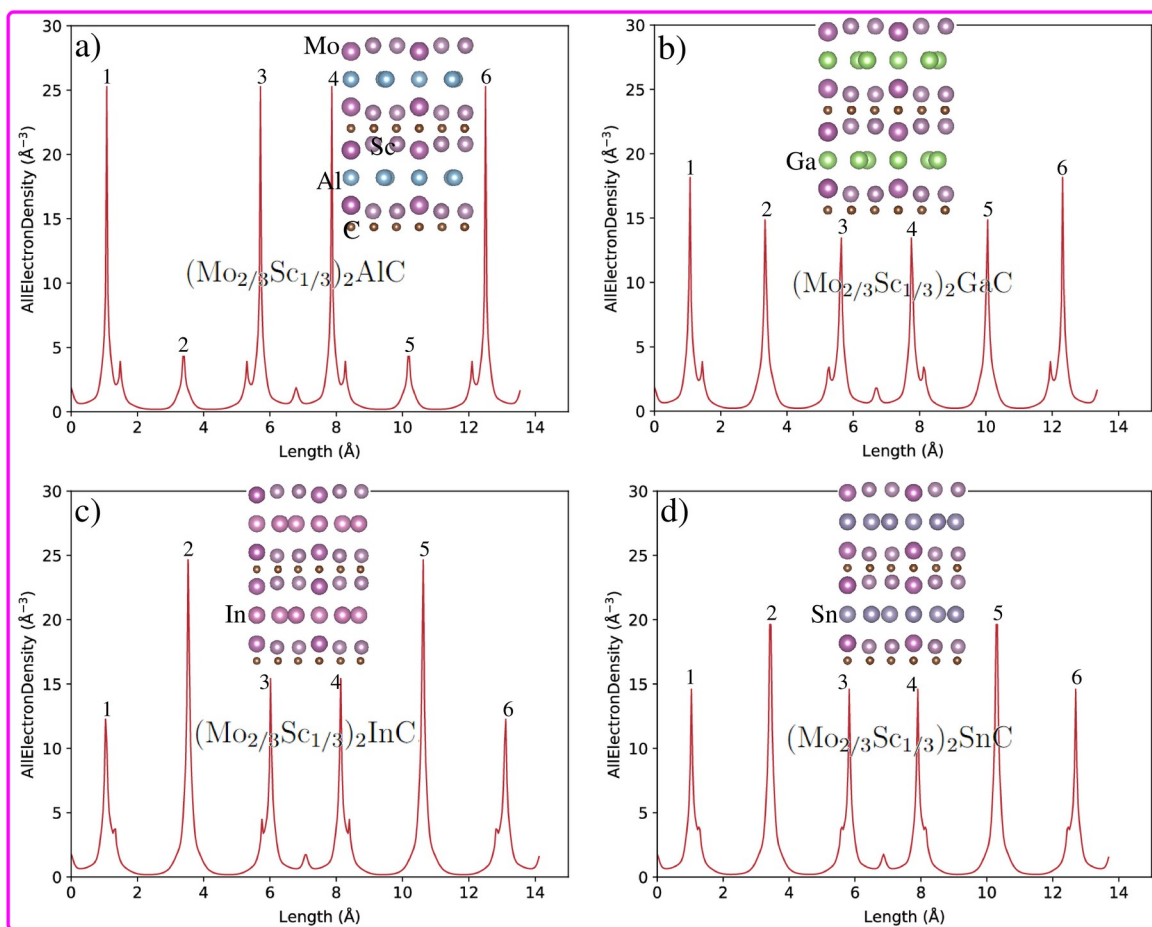

**Figure S1:** All electron density profile of the  $(\text{Mo}_{2/3}\text{Sc}_{1/3})_2\text{AlC}$ ,  $(\text{Mo}_{2/3}\text{Sc}_{1/3})_2\text{GaC}$ ,  $(\text{Mo}_{2/3}\text{Sc}_{1/3})_2\text{InC}$ , and  $(\text{Mo}_{2/3}\text{Sc}_{1/3})_2\text{Sc}$  i-MAX structures. Note that the peaks are numbered.

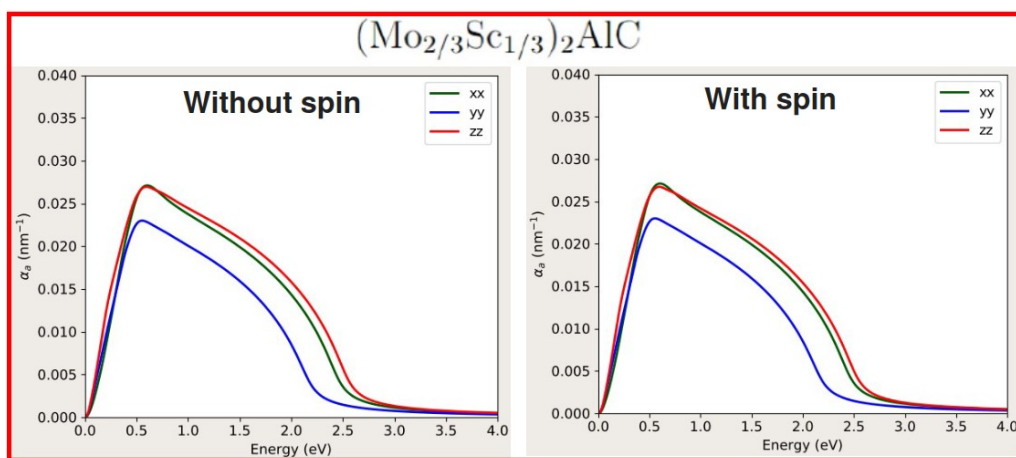

**Figure S2:** Comparing the photoabsorption spectra without and with spin.

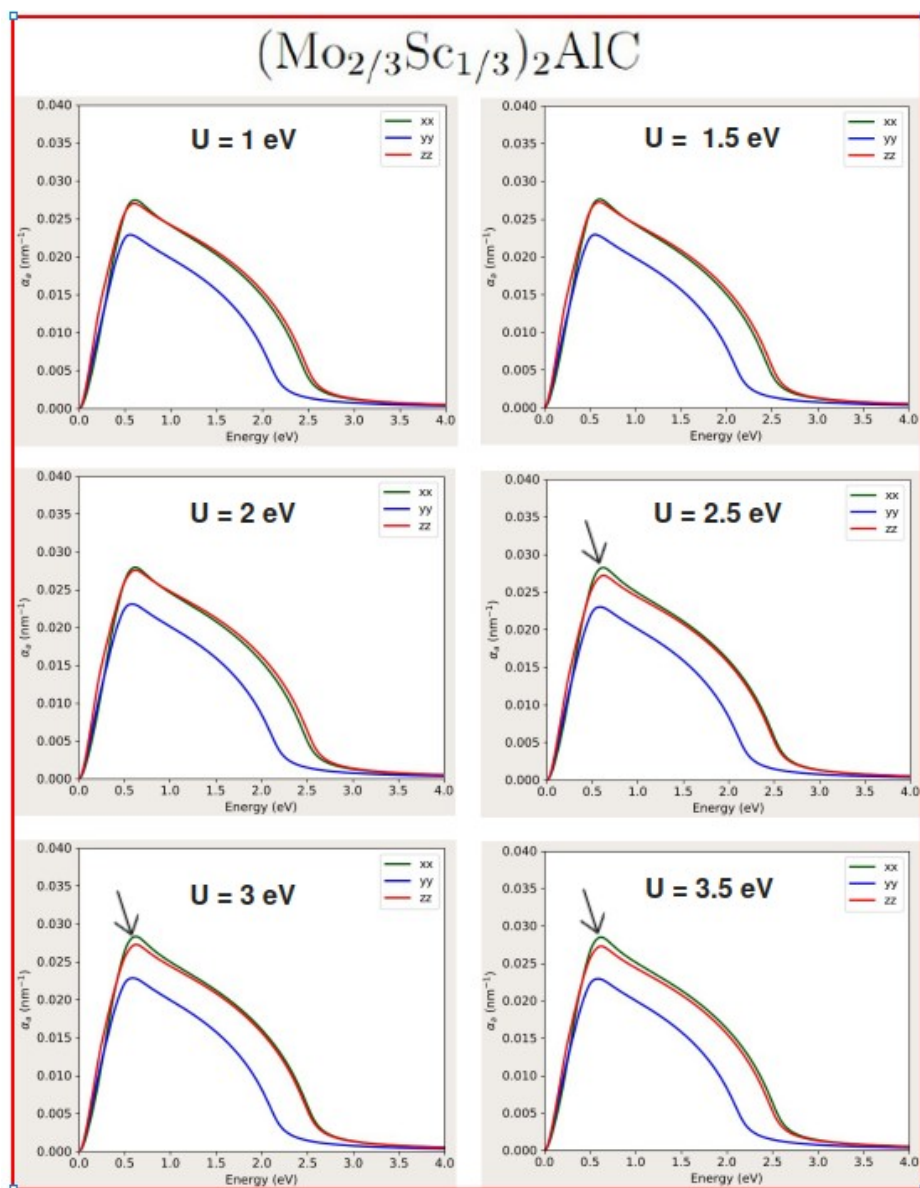

**Figure S3:** Photoabsorption spectra with Hubbard  $U$  parameter.

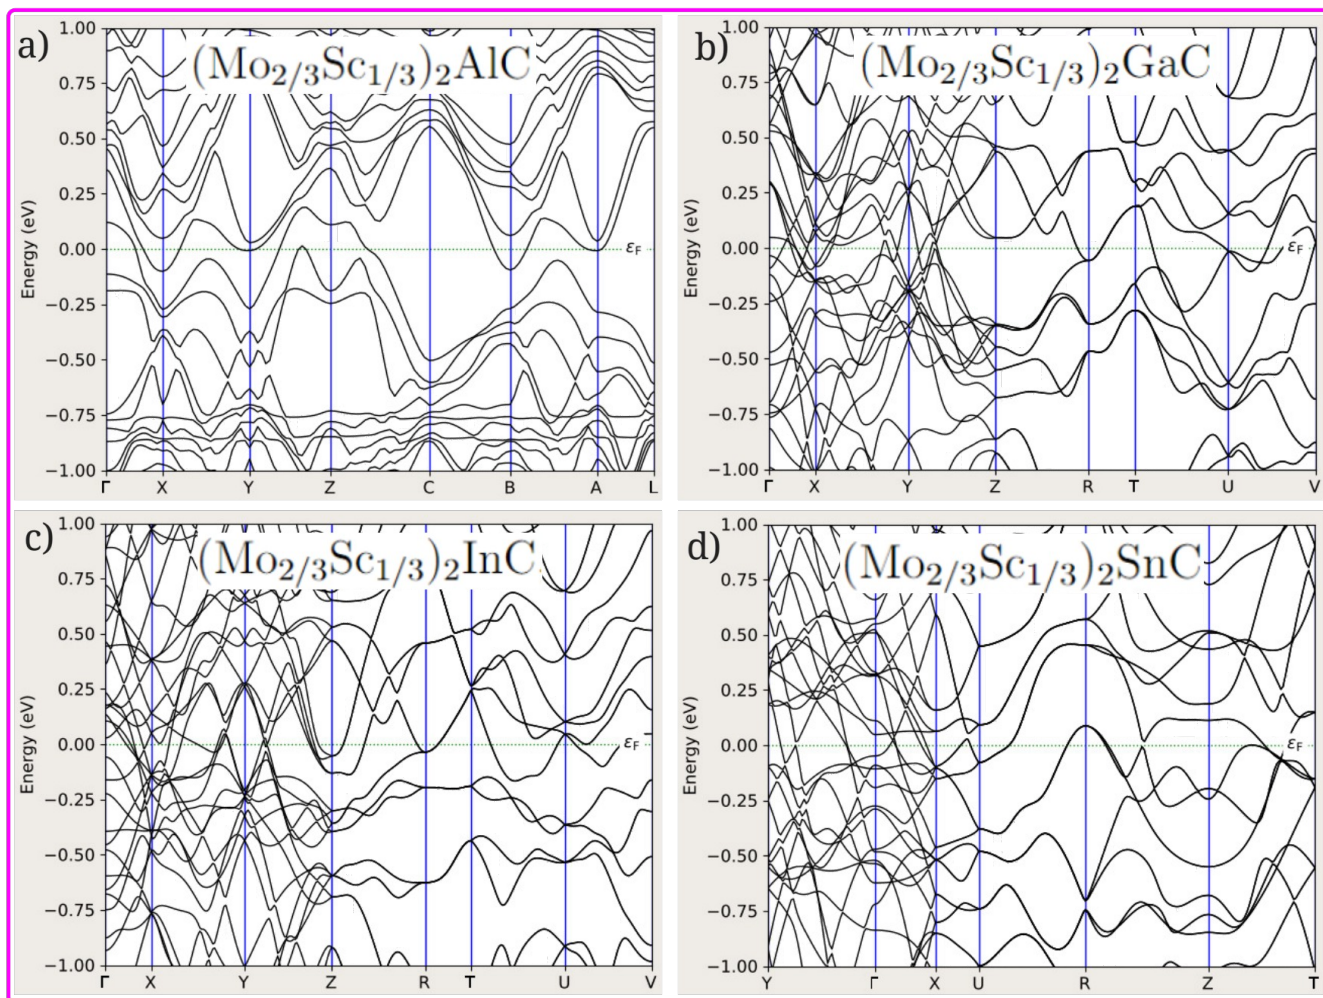

**Figure S4:** Band structure with HSE functional.
